# Supplementary material for: A New Glucosyl Flavone with Inhibitory Activity of Cancer Cell Viability and Other Bioactive Constituents from the Traditional Kurdish Plant Plantago loeflingii L.
Source: MDPI journal article supplement (doi:10.3390/molecules29051079), 2024-02-29
Supplement: s1 [file s1]

## SUPPLEMENTARY INFORMATION

# A New Glucosyl Flavone with Inhibitory Activity of Cancer Cell Viability and Other Bioactive Constituents from the Traditional Kurdish Plant *Plantago loeflingii* L.

Hawraz Ibrahim M. Amin \*, Kamaran Younis M. Amin, Chabaco Armijos, Faiq H. S. Hussain, Zanko Hassan Jawhar, Diego Caprioglio, Mariella Mella and Giovanni Vidari \*

|                                                                                                                                                                                                                                                                                                                                                                                                   |            |
|---------------------------------------------------------------------------------------------------------------------------------------------------------------------------------------------------------------------------------------------------------------------------------------------------------------------------------------------------------------------------------------------------|------------|
| <b>S1.</b> <sup>1</sup> H NMR spectrum (300 MHz, CD <sub>3</sub> OD) of compound <b>1</b> .                                                                                                                                                                                                                                                                                                       | Page 2     |
| <b>S2.</b> <sup>1</sup> H- <sup>1</sup> H COSY spectrum of compound <b>1</b> .                                                                                                                                                                                                                                                                                                                    | Page 3     |
| <b>S3.</b> <sup>13</sup> C NMR spectrum (75 MHz, CD <sub>3</sub> OD) of compound <b>1</b> .                                                                                                                                                                                                                                                                                                       | Page 4     |
| <b>S4.</b> DEPT spectrum of compound <b>1</b> .                                                                                                                                                                                                                                                                                                                                                   | Page 5     |
| <b>S5.</b> HSQC spectrum of compound <b>1</b> .                                                                                                                                                                                                                                                                                                                                                   | Page 6     |
| <b>S6.</b> HSQC spectrum (enlargement) of compound <b>1</b> .                                                                                                                                                                                                                                                                                                                                     | Page 7     |
| <b>S7.</b> ESI-MS (negative ion mode) spectrum of compound <b>1</b>                                                                                                                                                                                                                                                                                                                               | Page 8     |
| <b>S8.</b> TLC chromatograms (RP 18 phase; eluent: MeOH-H <sub>2</sub> O, 55:45) of subextract B3 and the fractions resulting from its MPLC separation. Circled spots were visualized under UV light (254 nm) after spraying with vanillin-sulfuric acid reagent (see <i>Section 3.1.</i> in Material and Methods). A: crude extract B3; B-C: fractions resulting from the MPLC separation of B3. | Pages 8-10 |

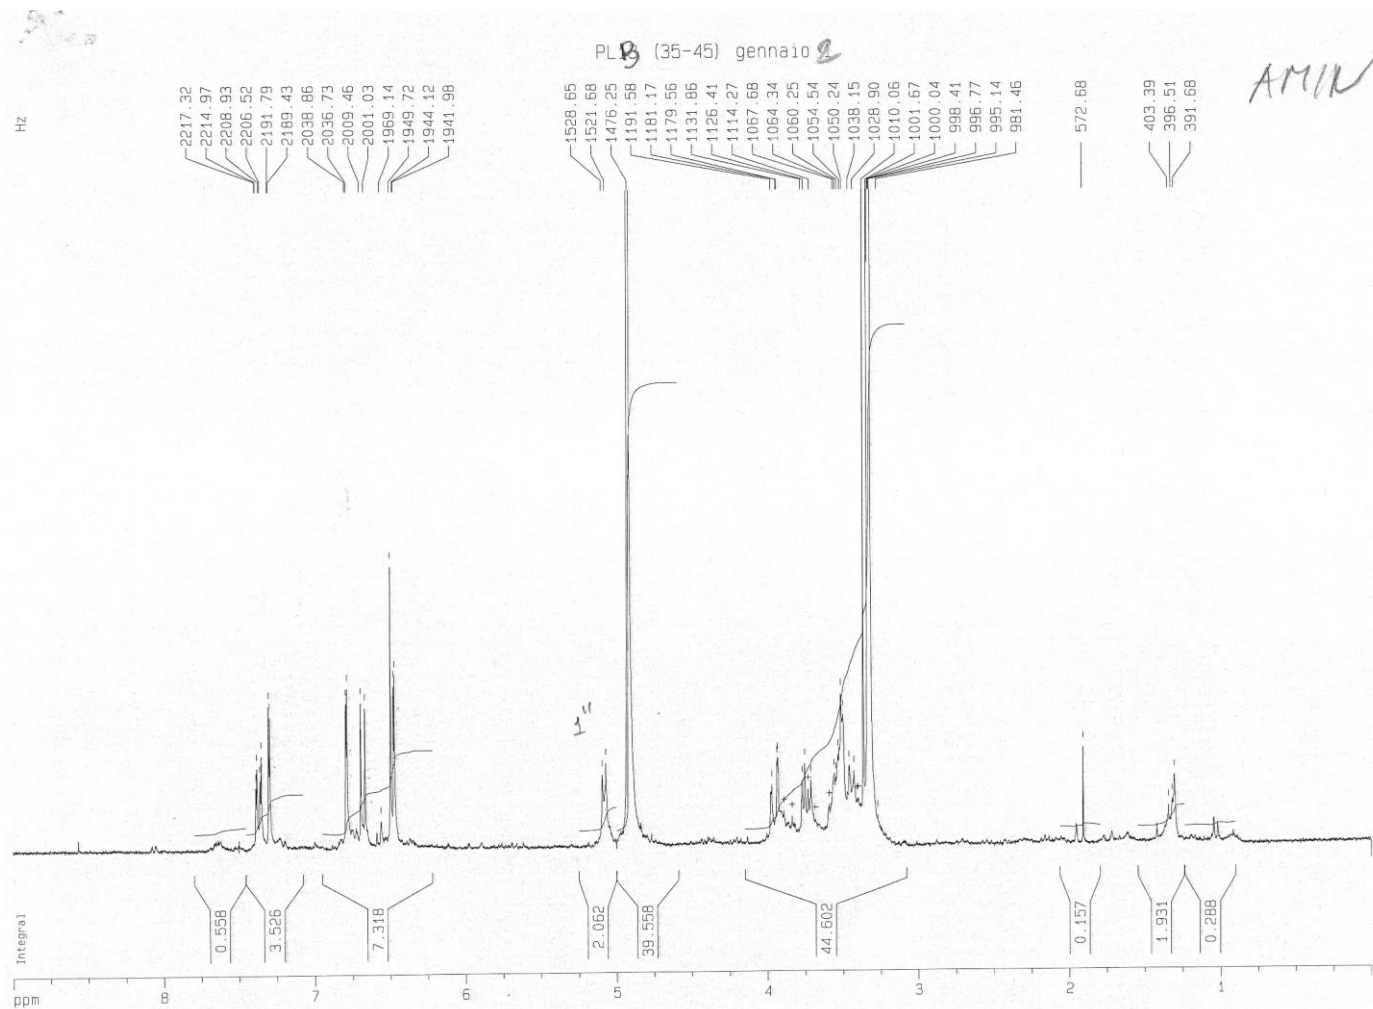

**Figure S1.**  $^1\text{H}$  NMR spectrum (300 MHz,  $\text{CD}_3\text{OD}$ ) of compound 1.

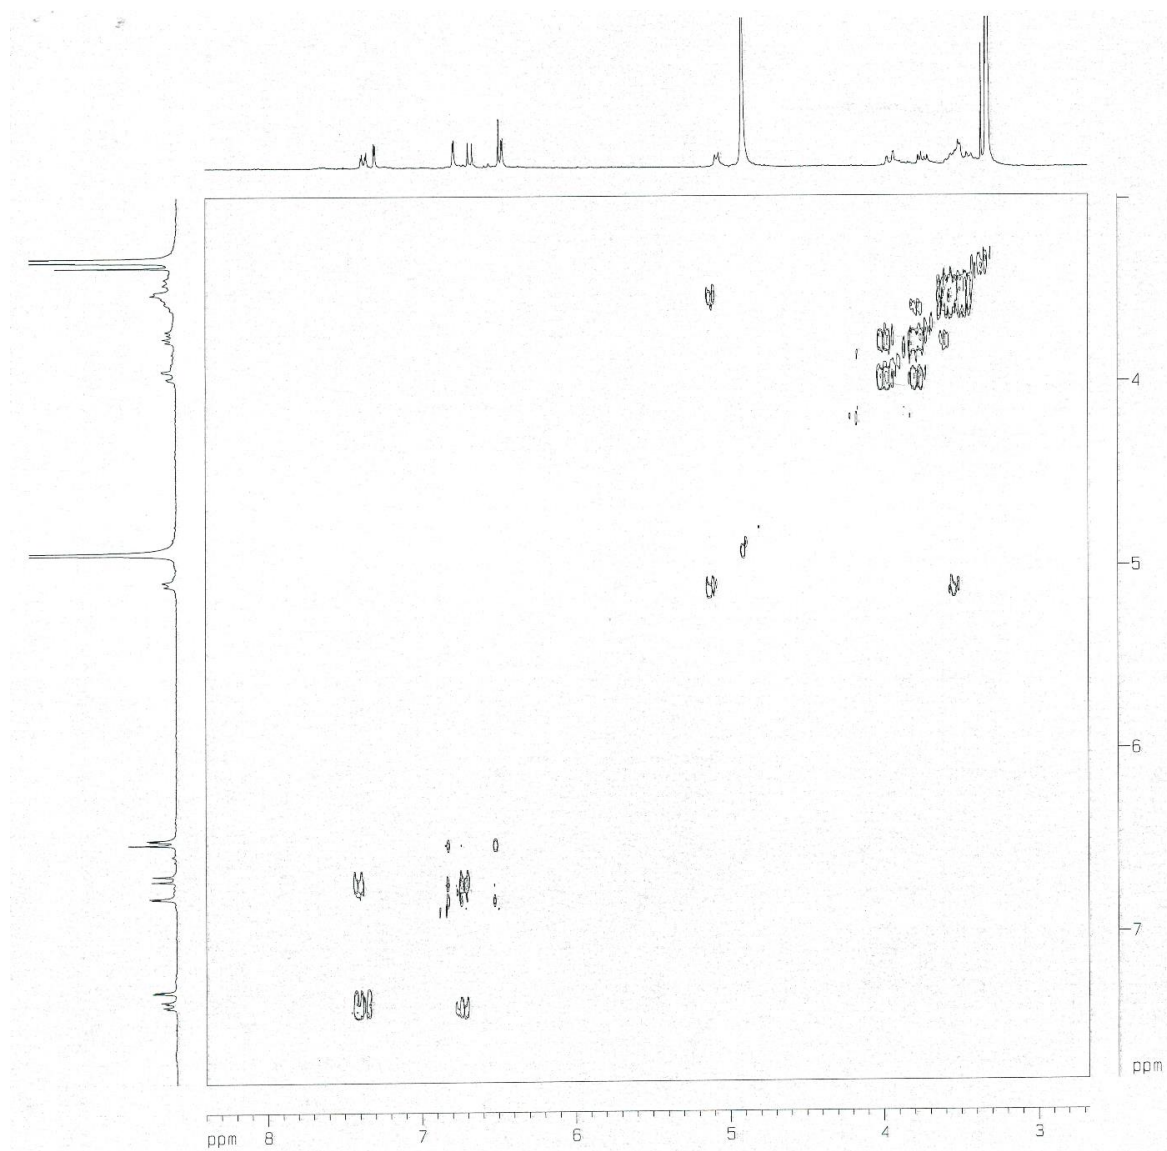

**Figure S2.**  $^1\text{H}$ - $^1\text{H}$  COSY spectrum of compound **1**.

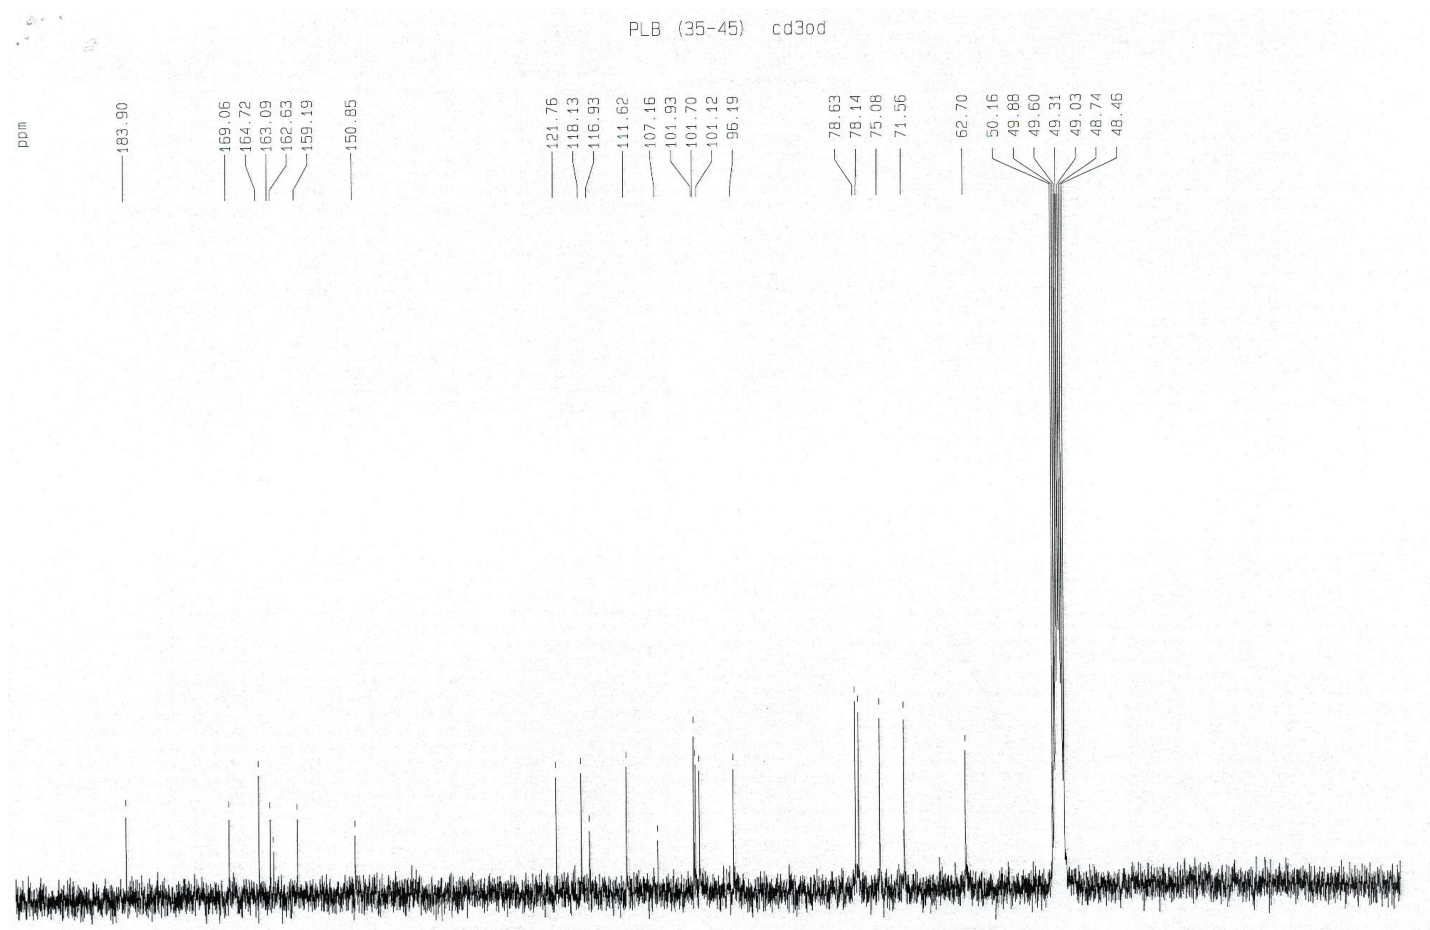

**Figure S3.**  $^{13}\text{C}$  NMR spectrum (75 MHz,  $\text{CD}_3\text{OD}$ ) of compound **1**.

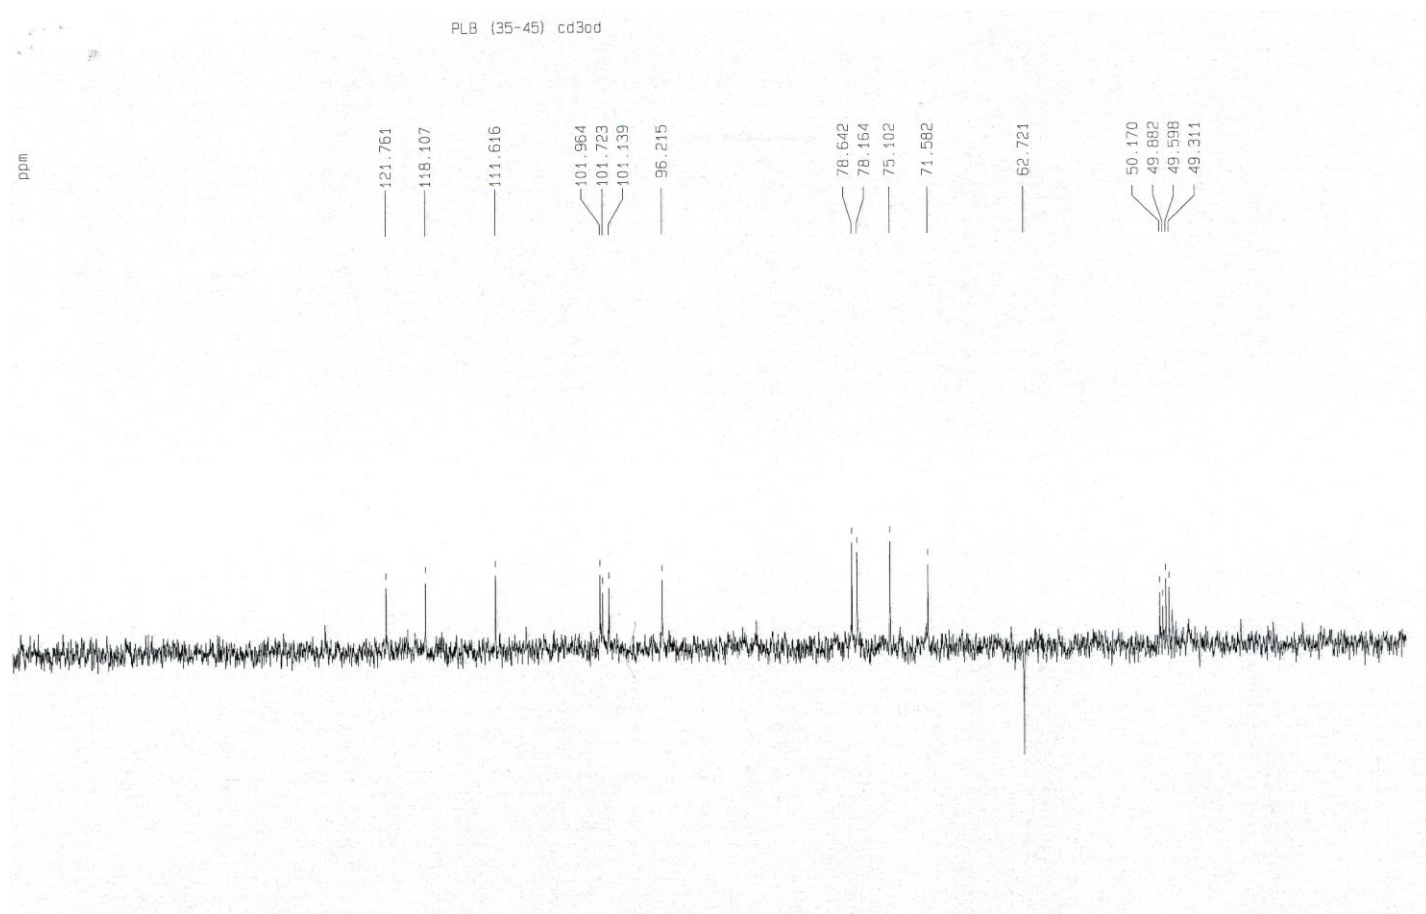

**Figure S4.** DEPT spectrum of compound **1**.



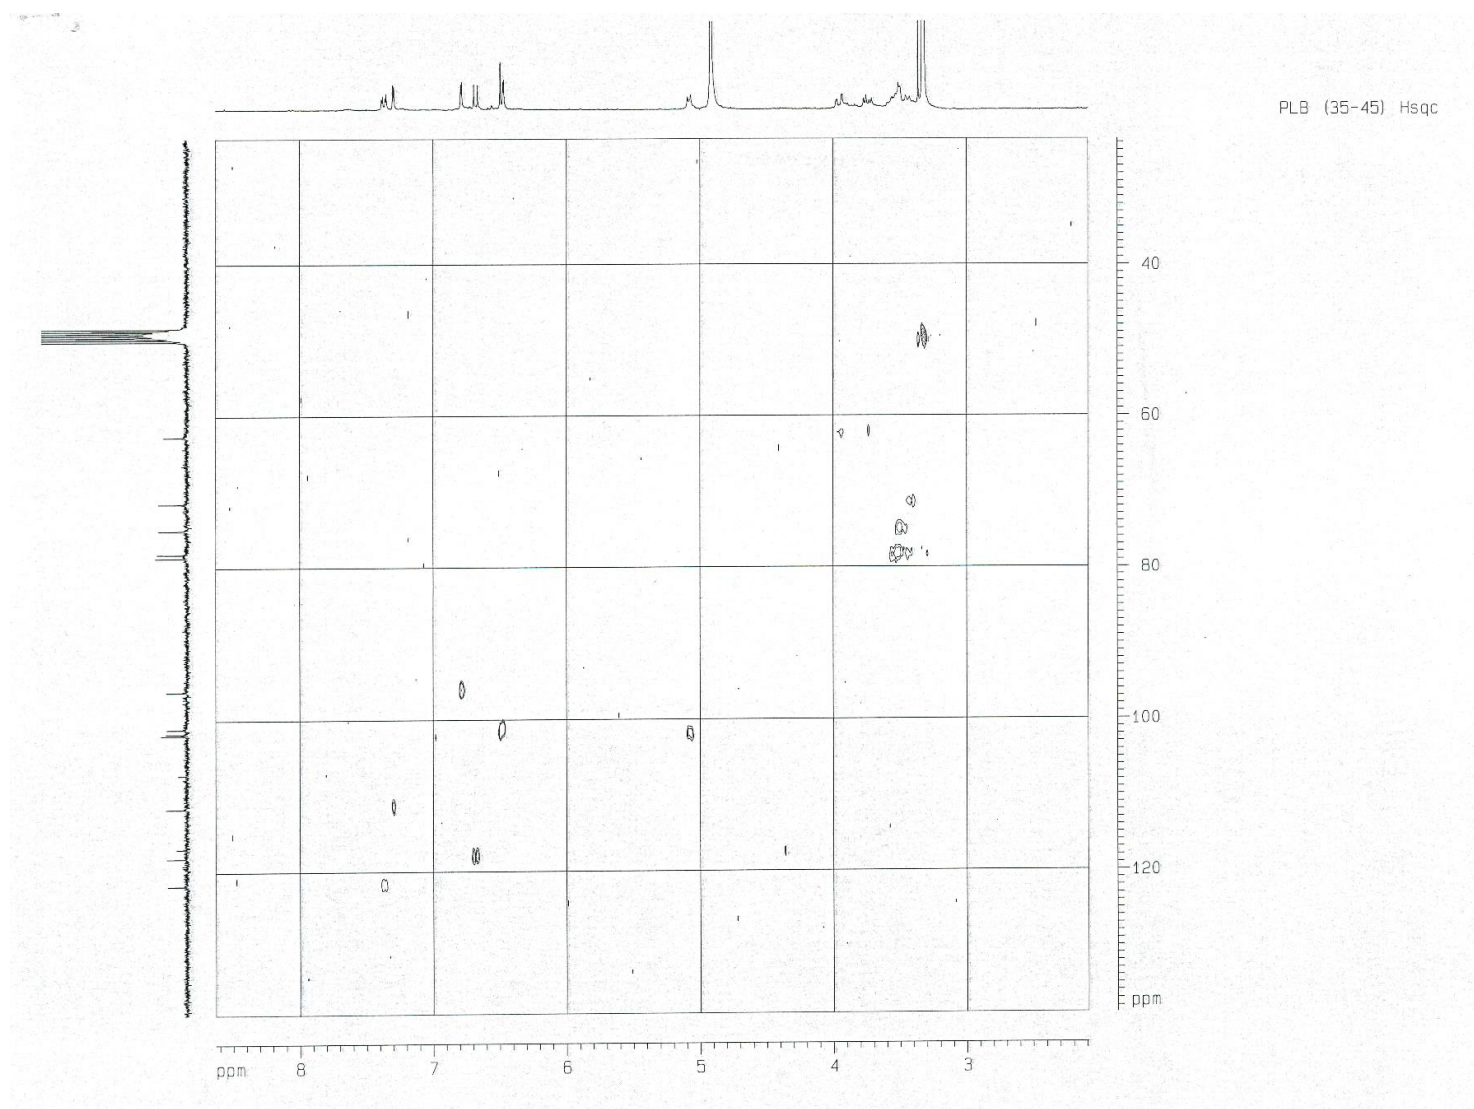

**Figure S5.** HSQC spectrum of compound **1**.

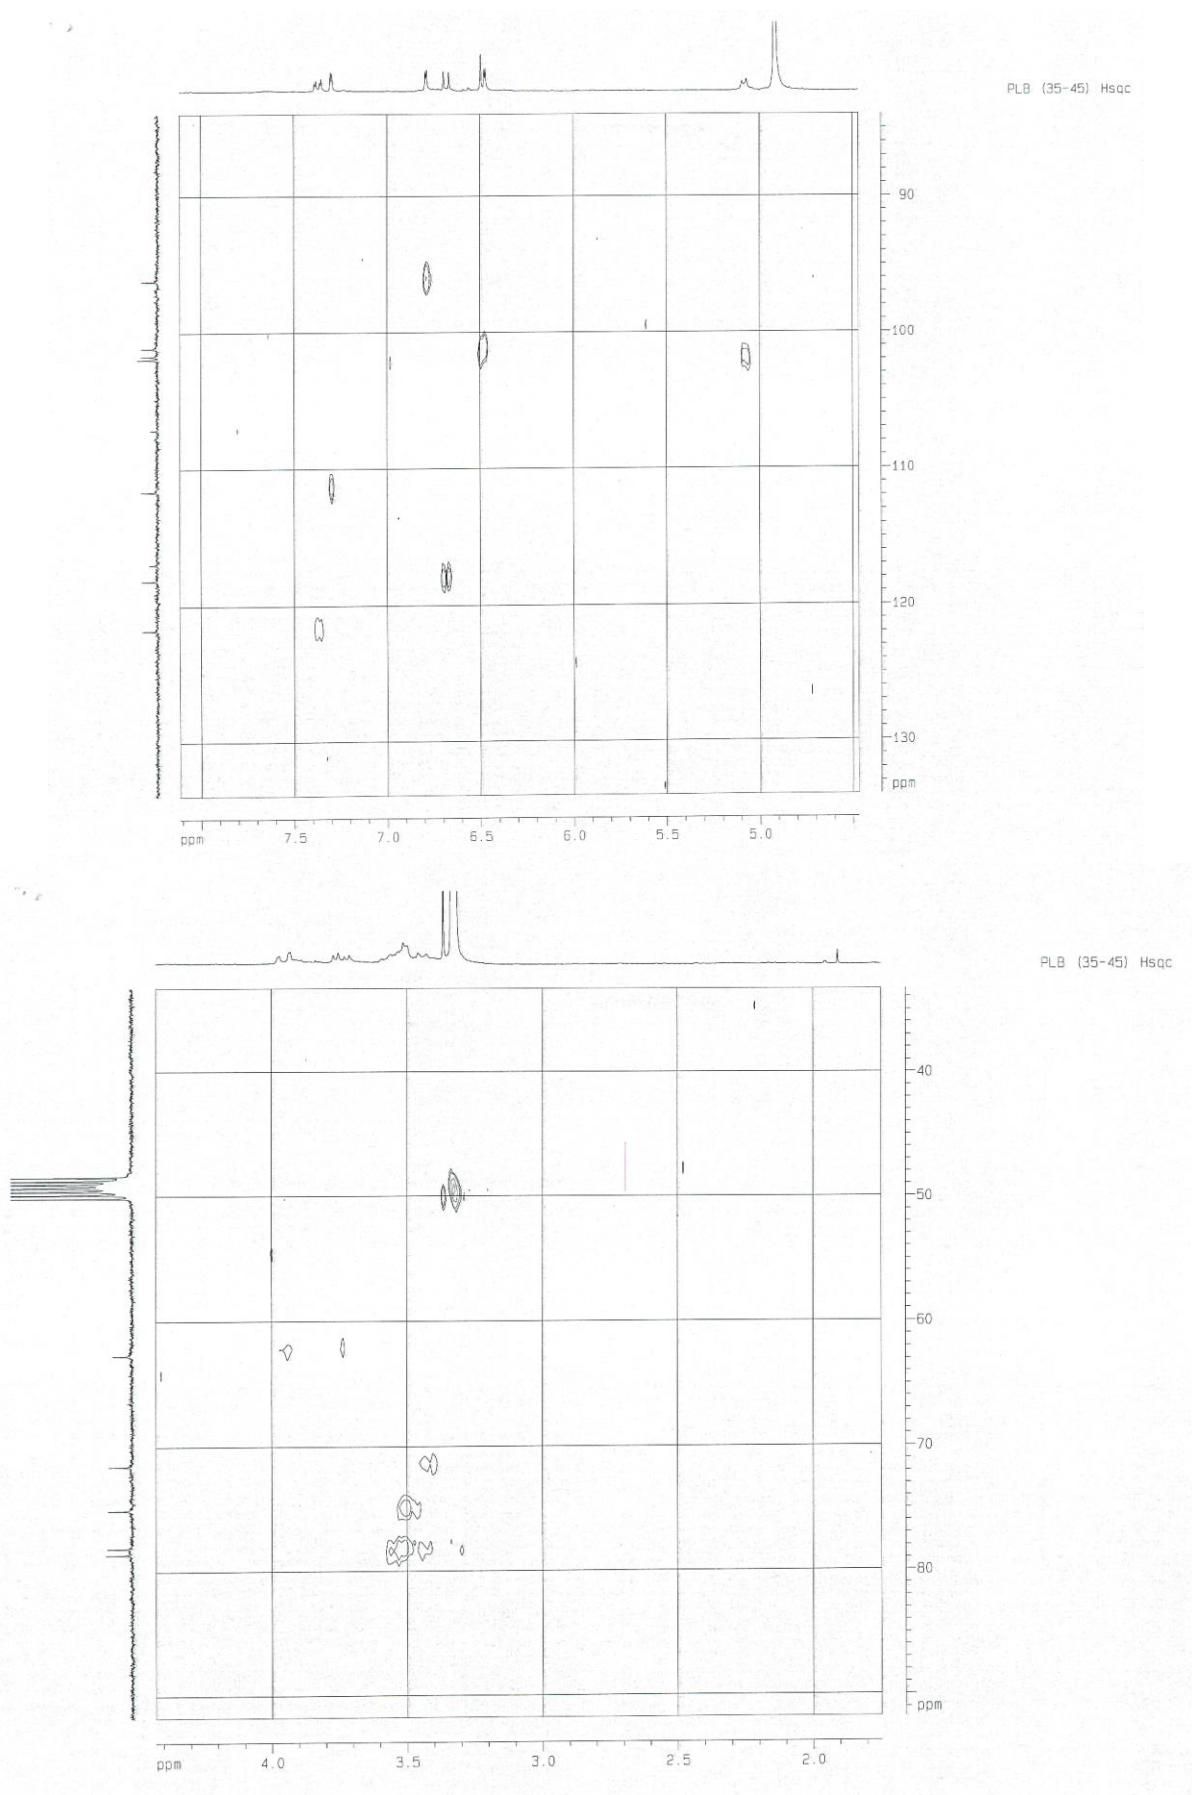

**Figure S6.** HSQC spectrum (enlargement) of compound **1**.

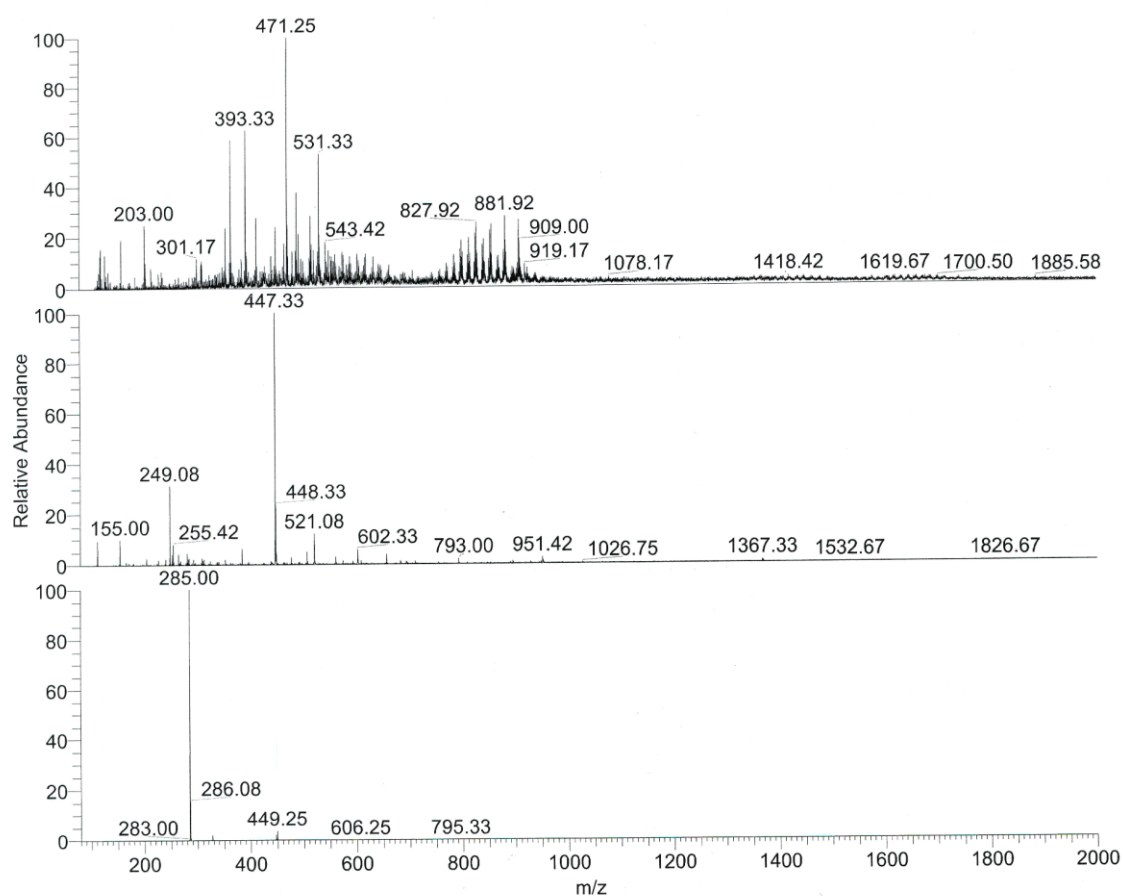

**Figure S7.** ESI-MS (negative ion mode) spectrum of compound **1**.

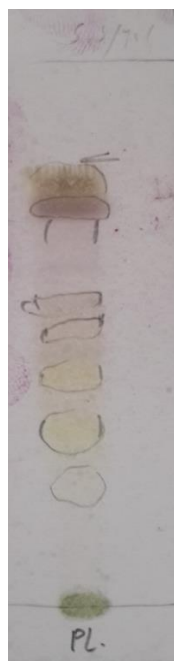



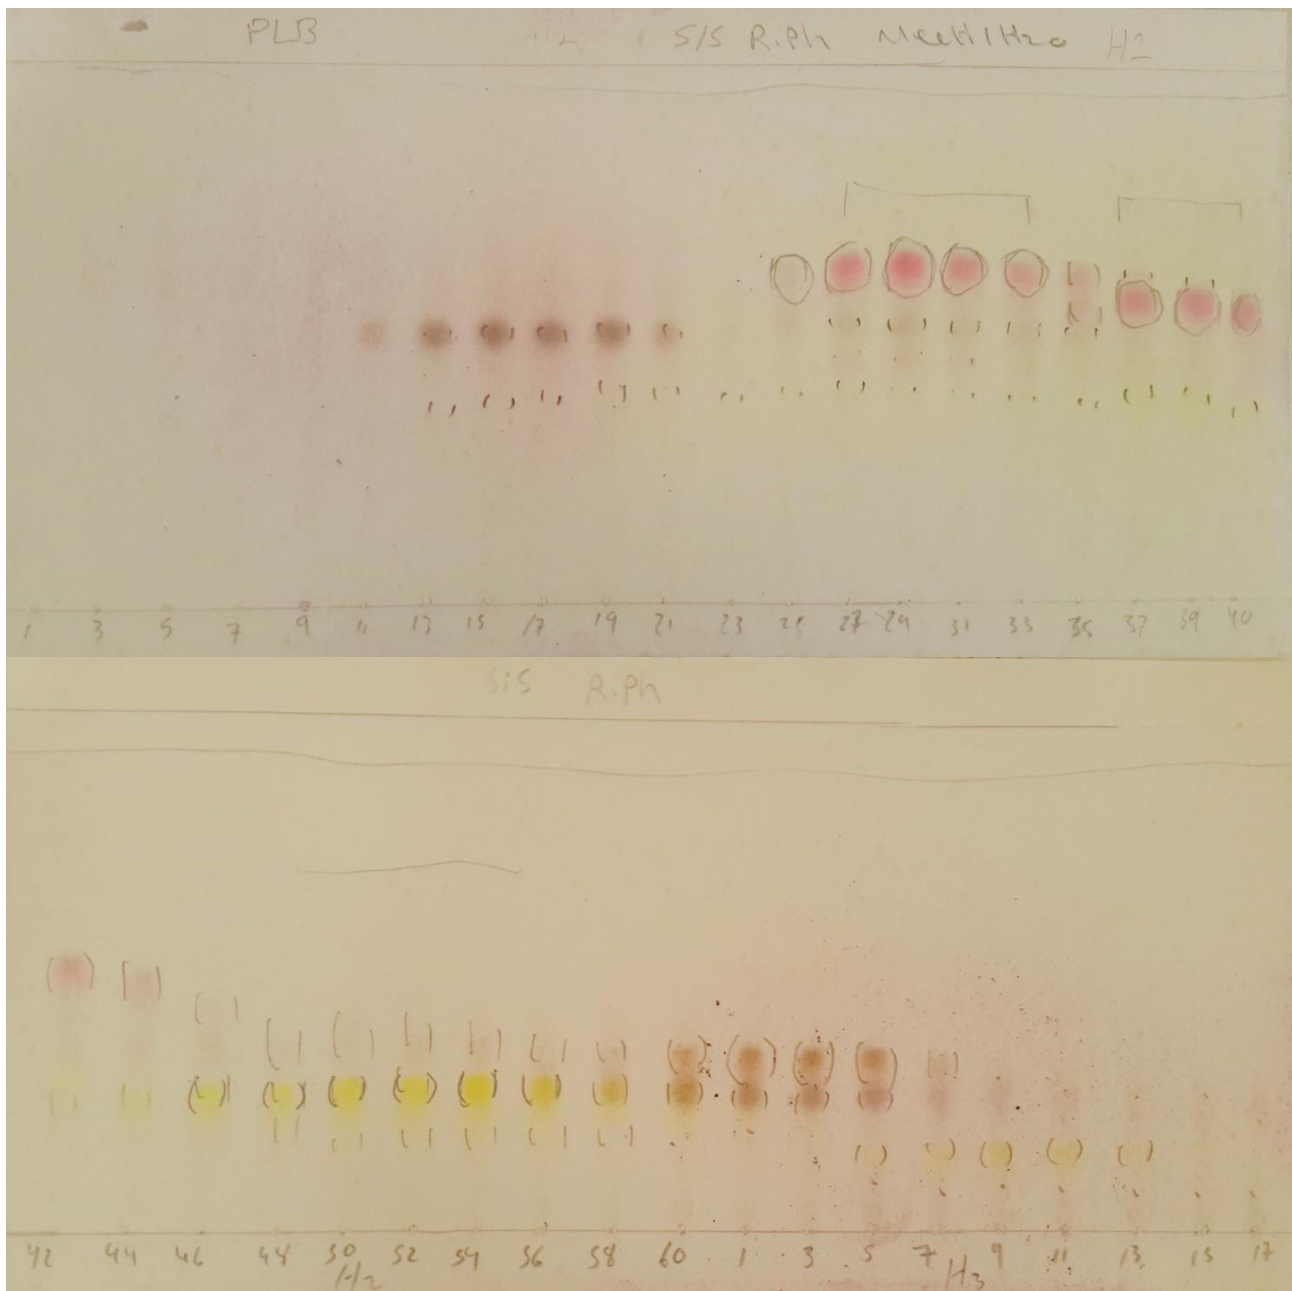

B

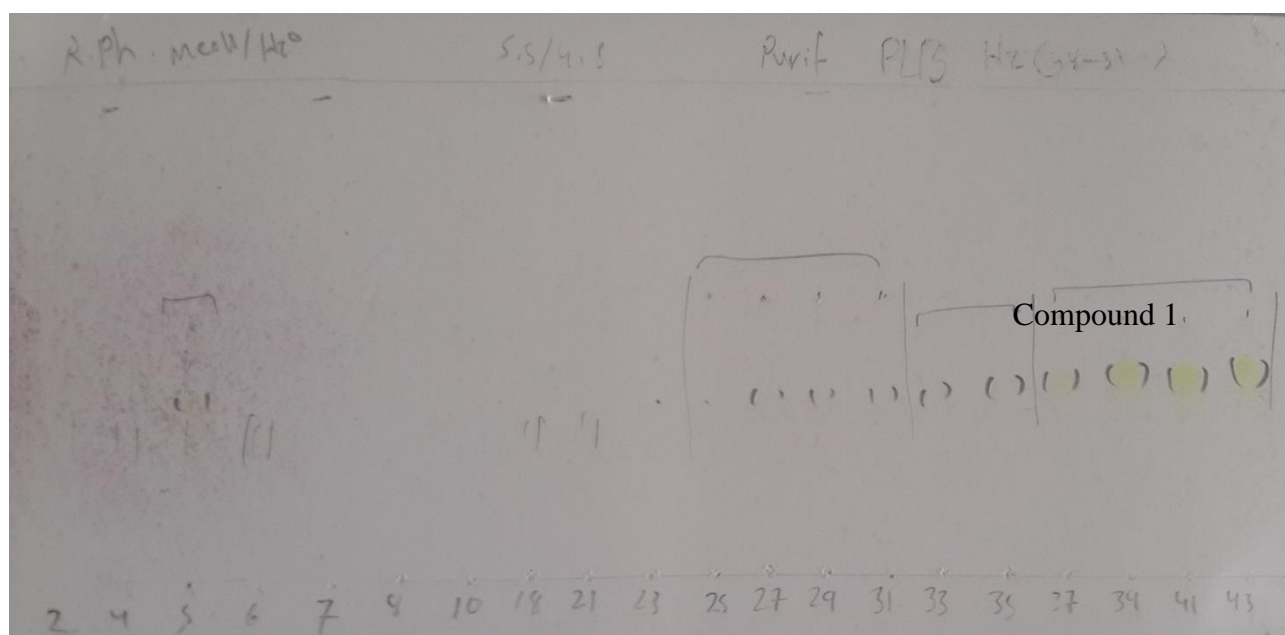

C

**Figure S8.** TLC chromatograms (RP 18 phase; eluent: MeOH-H<sub>2</sub>O, 55:45) of subextract B3 and the fractions resulting from its MPLC separation. Circled spots were visualized under UV light (254 nm) after spraying with vanillin-sulfuric acid reagent (see *Section 3.1.* in Material and Methods). A: crude extract B3; B-C: fractions resulting from the MPLC separation of B3.
